# Supplementary material
Source: PubMed Central journal article supplement (PMC3436169)

## SUPPLEMENTAL DATA

**Supplementary Figure 1.** Association of BAF57 and BAF155 with PRMT7 target DNA repair genes. Cross-linked chromatin from control NIH 3T3/sh-GFP and NIH 3T3/sh-PRMT7-1 cells was immunoprecipitated with either pre-immune (PI), anti-BAF57, or anti-BAF155 antibody, and the purified DNA was checked for enrichment of promoter sequences of PRMT7 target genes using specific primers. Fold enrichment was determined relative to the PI sample.

**Supplementary Figure 2.** PRMT1 and PRMT4 are not recruited to PRMT7 target genes. (A-D) ChIP assays were carried out using chromatin from control NIH 3T3/sh-GFP and sh-PRMT7-1 cells as described in supplementary figure 1, and the immunoprecipitated DNA was analyzed by real time PCR using gene-specific primers. BIRC5 and MYC were used as positive controls.

**Supplementary Figure 3.** Anti- H2A(Me<sub>2</sub>)R3 and anti-H4(Me<sub>2</sub>)R3 antibodies are highly specific and do not cross-react with other histone peptides. Approximately 1 or 2 µg of either symmetrically methylated H2A (A) or H4 (B) peptides were slot-blotted on nitrocellulose, and methylation was detected using anti-H2A(Me<sub>2</sub>)R3. To show specificity of the anti-H4(Me<sub>2</sub>)R3 antibody, either 1 or 2 µg of symmetrically methylated H4 (C) or H2A (B) peptides were slot-blotted and detected by Western blot analysis using anti-H4(Me<sub>2</sub>)R3 antibody. Unmethylated H2A, H4, and BSA were used as controls.

**Supplementary Figure 4.** NIH 3T3/sh-PRMT7-2 knock down cells are resistant to DNA damaging drugs. Drug treatments were carried out as described in figure 6 using an equal number ( $2 \times 10^5$ ) of control NIH 3T3/sh-GFP and NIH 3T3/sh-PRMT7-2 cells, and proliferation was monitored every two days for 6 days. Viability was determined by trypan blue staining cells, and each drug treatment experiment was conducted twice in triplicate.

**Supplementary Figure 5.** PRMT5 knock down cells do not show resistance to DNA-damaging drugs. (A-D) Drug treatments were carried out as described in experimental procedures using an equal number ( $2 \times 10^5$ ) of control NIH 3T3 and PRMT5 knock down cells (AS-PRMT5). Proliferation was monitored every two days for 6 days, and each experiment was conducted twice in triplicate.

**Supplementary Figure 6.** PRMT7 knock down cells are more resistant to cisplatin-induced DNA damage. An equal number ( $5 \times 10^6$ ) of control NIH 3T3/sh-GFP or NIH 3T3/sh-PRMT7-1 cells were treated with cisplatin (10 µg/ml) and harvested at days 0, 4 and 6. Cells were stained with FITC-Annexin V antibody and propidium iodide before they were analyzed by flow cytometry.

**Supplementary Figure 7.** Knock down of the polymerase delta catalytic subunit POLD1 re-sensitizes NIH 3T3/sh-PRMT7-2 knock down cells to DNA damage. (A-D) Growth rates of control NIH 3T3/sh-GFP, NIH 3T3/sh-PRMT7-2, and NIH 3T3/sh-PRMT7-2 cells, where expression of individual DNA repair genes has been knocked down, were measured by seeding  $2 \times 10^5$  cells in each plate and treating cells with cisplatin as described in experimental procedures. The number of viable cells was determined by trypan blue staining every 2 days for 6 days. Each experiment was conducted in triplicate and repeated twice.

Figure 1

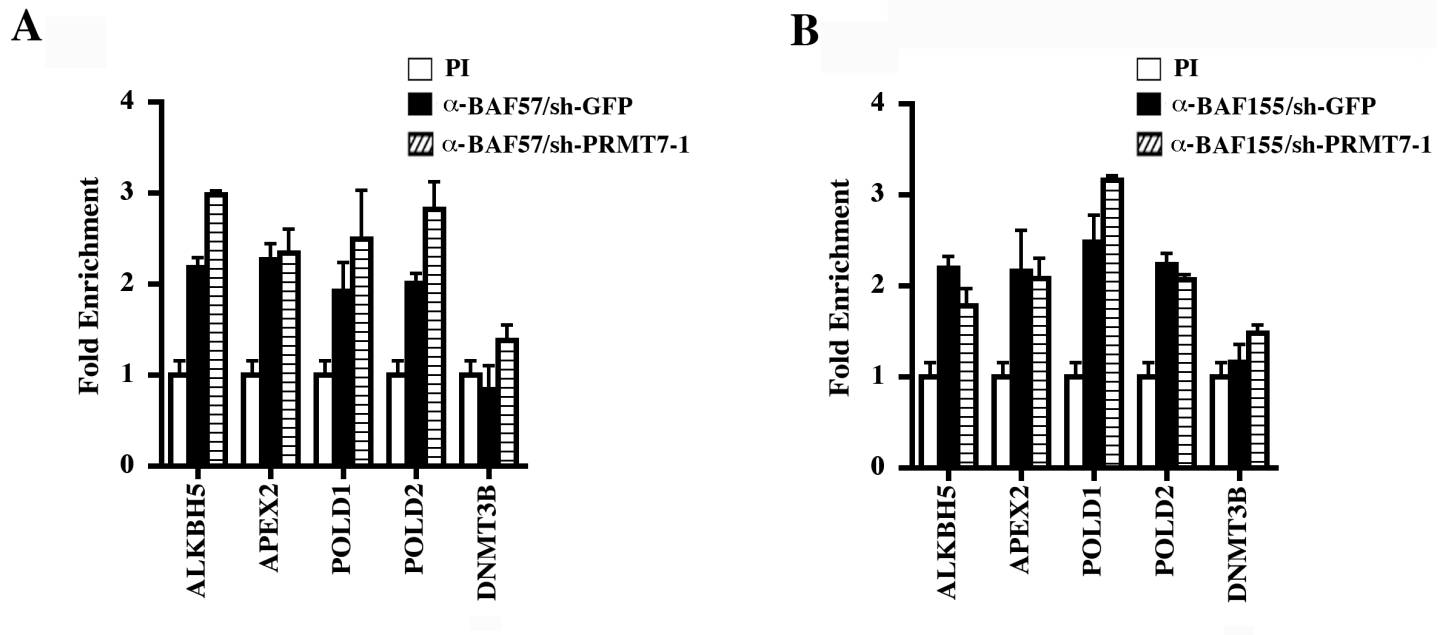

Figure 2

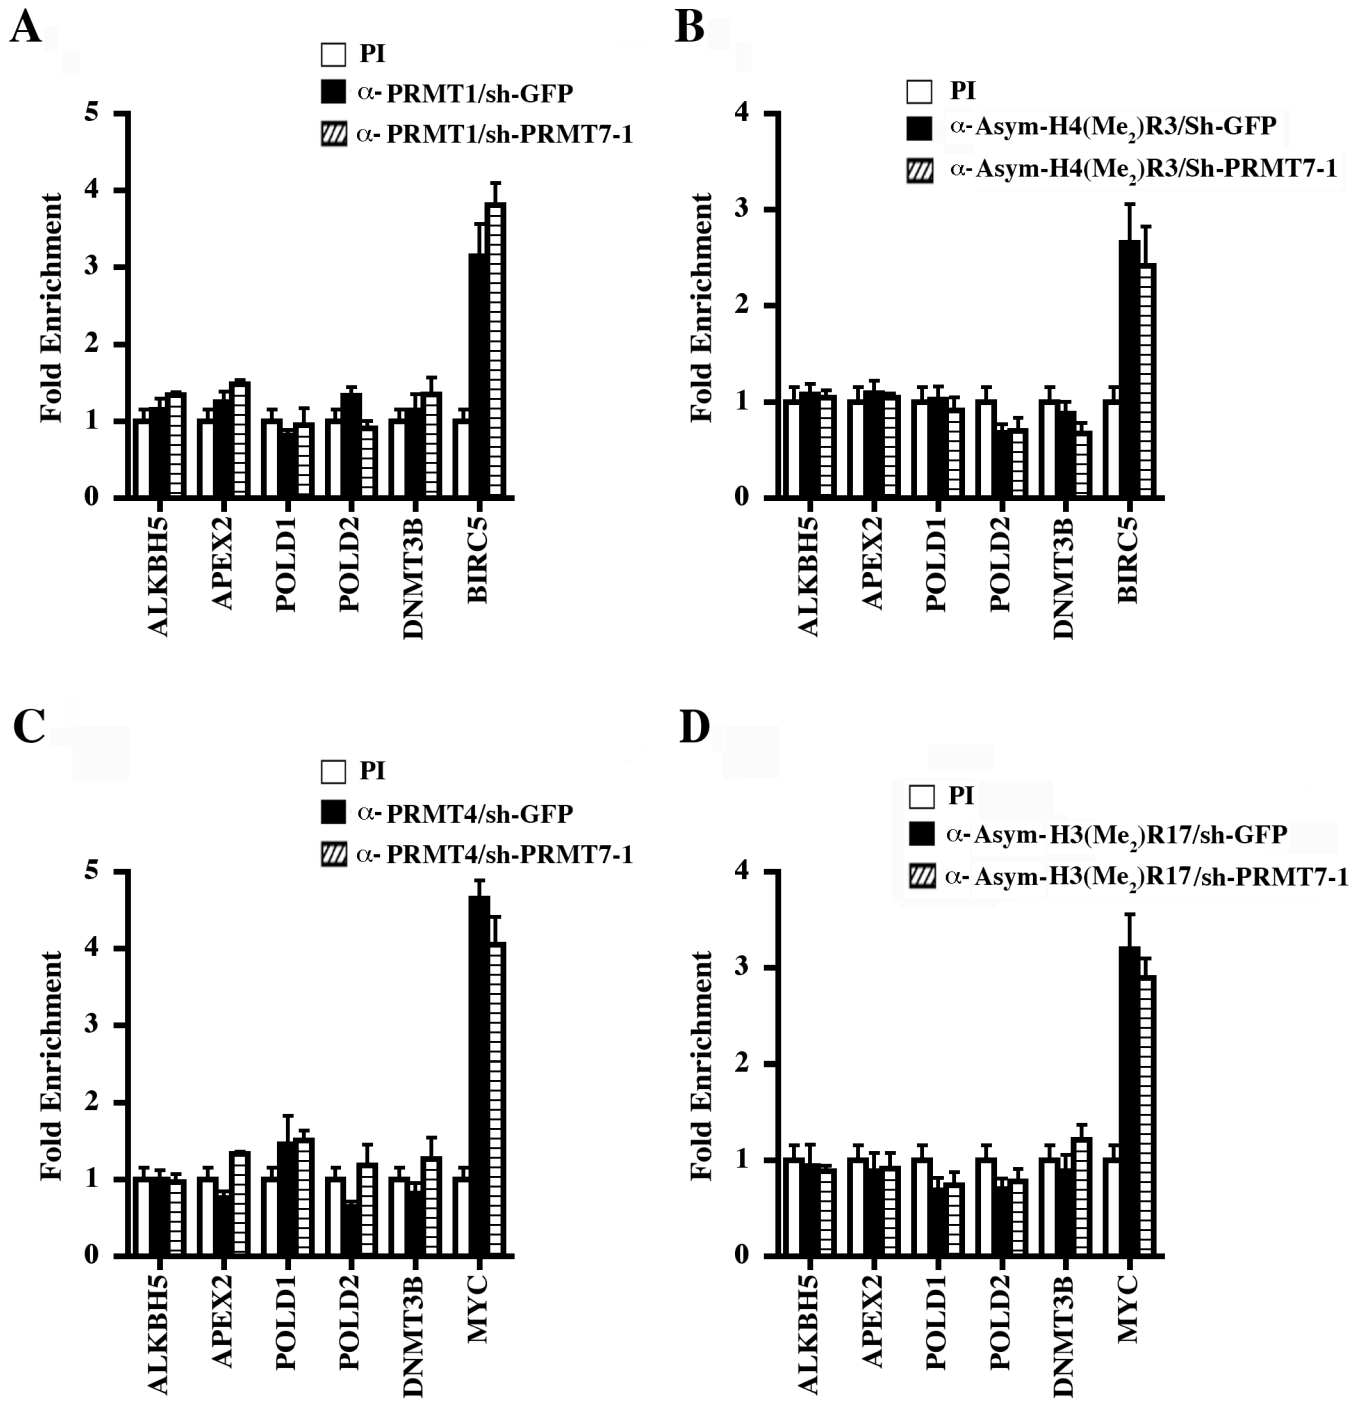

Figure 3

**A**

H2A peptides ( $\mu\text{g}$ )

1 2

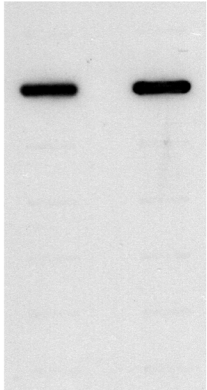

H2A (1-30)  
H2A(Me<sub>2</sub>)R3  
H2A(Me<sub>2</sub>)R11  
H2A(Me<sub>2</sub>)R17  
H2A(Me<sub>2</sub>)R20  
H2A(Me<sub>2</sub>)R29  
BSA

Anti-H2A(Me<sub>2</sub>)R3

**B**

H4 peptides ( $\mu\text{g}$ )

1 2

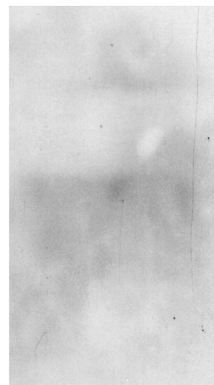

H4 (1-30)  
H4(Me<sub>2</sub>)R3  
H4(Me<sub>2</sub>)R17  
H4(Me<sub>2</sub>)R19  
H4(Me<sub>2</sub>)R23  
BSA

Anti-H2A(Me<sub>2</sub>)R3

**C**

H4 peptides ( $\mu\text{g}$ )

1 2

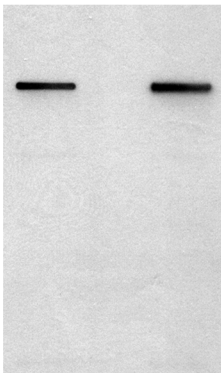

H4 (1-30)  
H4(Me<sub>2</sub>)R3  
H4(Me<sub>2</sub>)R17  
H4(Me<sub>2</sub>)R19  
H4(Me<sub>2</sub>)R23  
BSA

Anti-H4(Me<sub>2</sub>)R3

**D**

H2A peptides ( $\mu\text{g}$ )

1 2

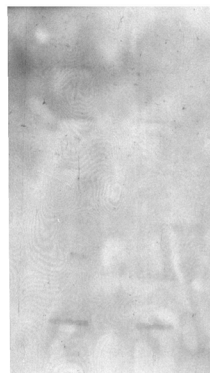

H2A (1-30)  
H2A(Me<sub>2</sub>)R3  
H2A(Me<sub>2</sub>)R11  
H2A(Me<sub>2</sub>)R17  
H2A(Me<sub>2</sub>)R20  
H2A(Me<sub>2</sub>)R29  
BSA

Anti-H4(Me<sub>2</sub>)R3

Figure 4

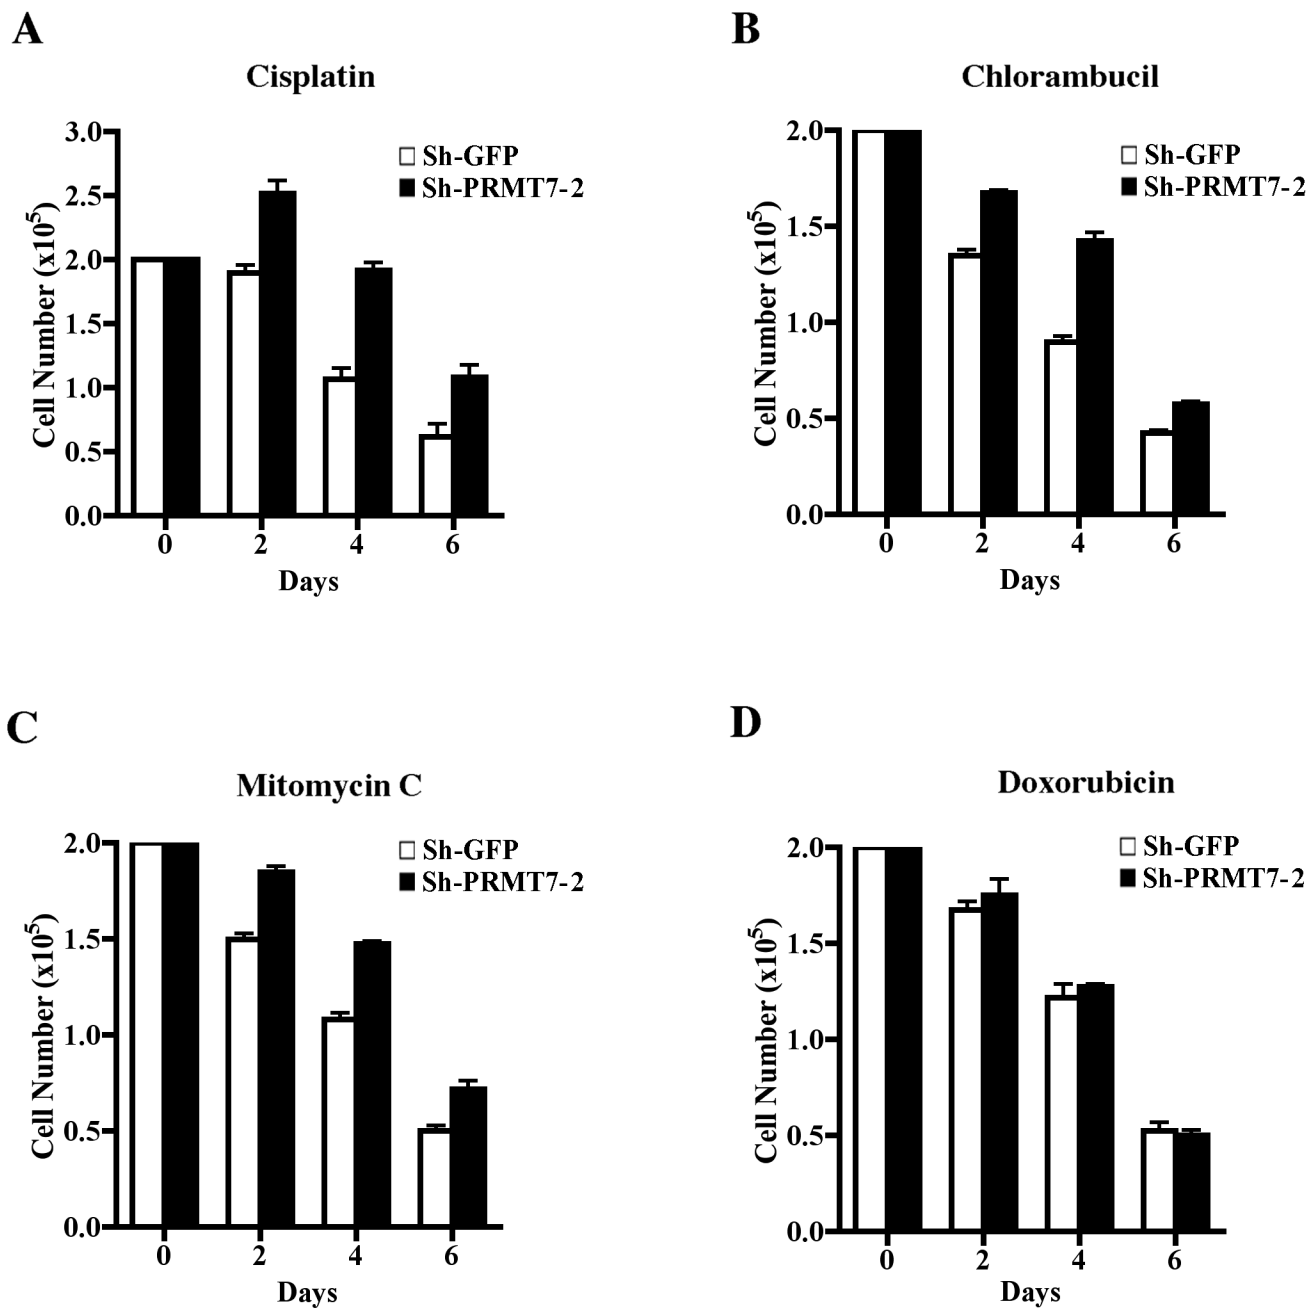

Figure 5

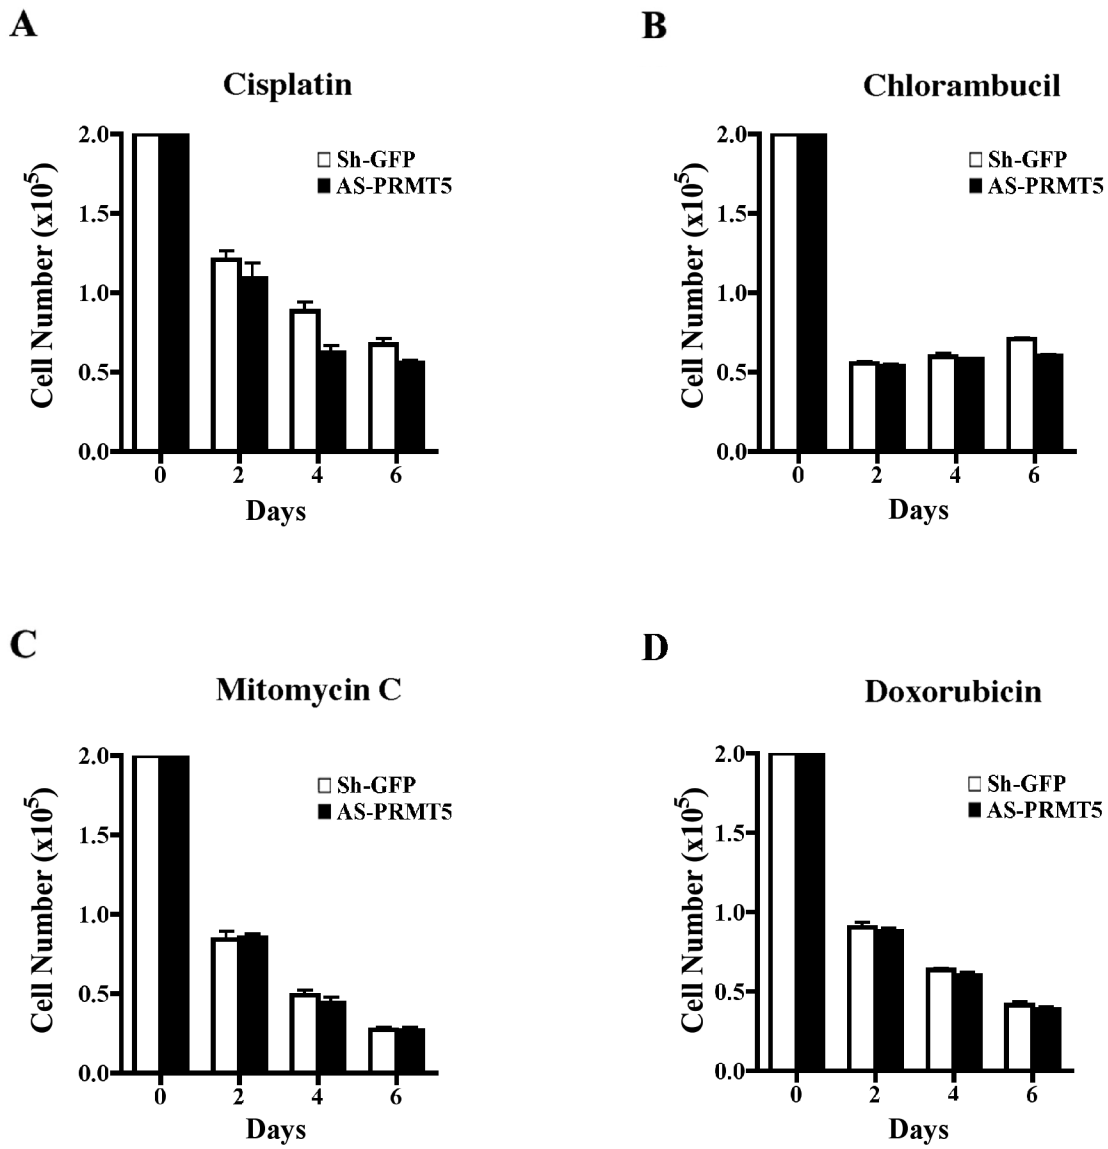

Figure 6

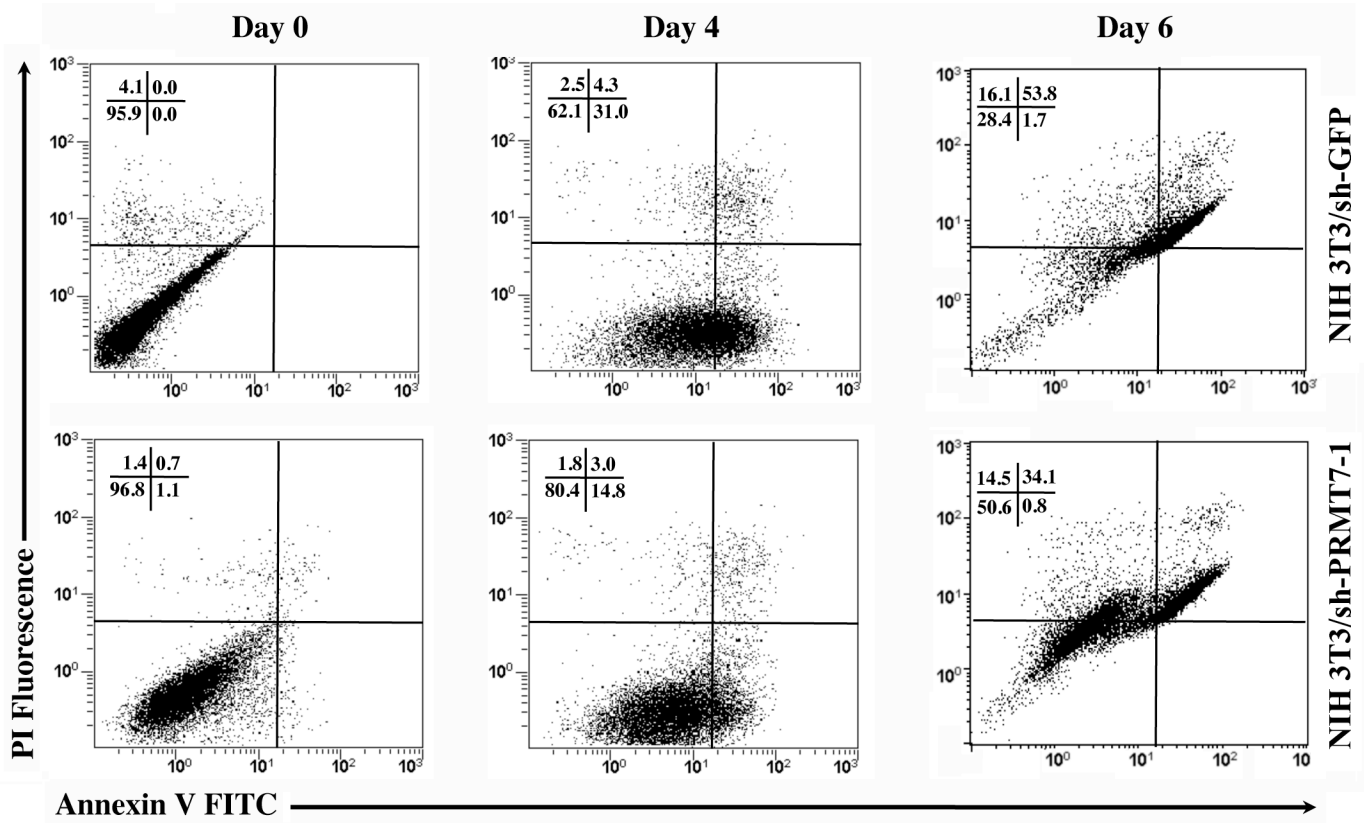

Figure 7

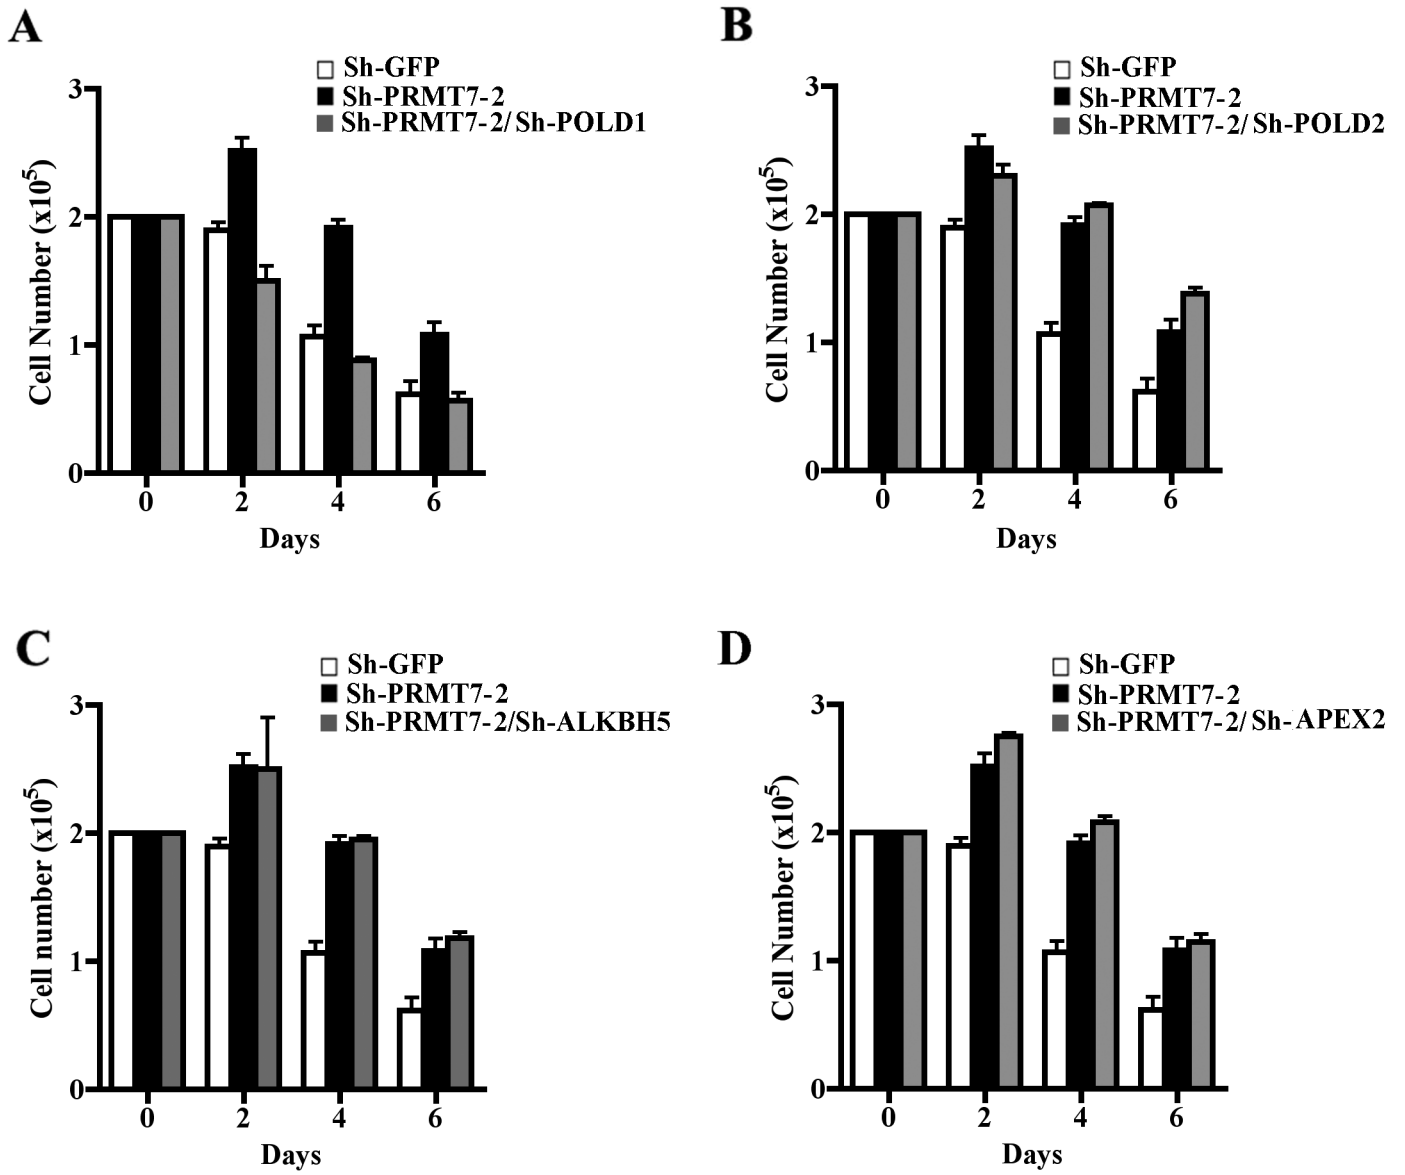

Supplement: supp_M112.378281_jbc.M112.378281-5.pdf [file supp_M112.378281_jbc.M112.378281-5.pdf]
